# Supplementary material for: Behavioral Health Diagnoses and Health Care Use Before and During the COVID-19 Pandemic
Source: Atypon-hosted journal article supplement (doi:10.1176/appi.ps.202100133), 2022-01-07
Supplement: appi.ps.202100133.ds001.pdf [file appi.ps.202100133.ds001.pdf]

1 Online supplement for DOI 10.1176/appi.ps.202100133

2  
3 Clinical Diagnosis Definitions

4  
5 Adjustment Disorders was determined by any of the following ICD-10CM codes:

6

|        |                                                                    |
|--------|--------------------------------------------------------------------|
| F43.20 | Adjustment disorder, unspecified                                   |
| F43.21 | Adjustment disorder with depressed mood                            |
| F43.22 | Adjustment disorder with anxiety                                   |
| F43.23 | Adjustment disorder with mixed anxiety and depressed mood          |
| F43.24 | Adjustment disorder with disturbance of conduct                    |
| F43.25 | Adjustment disorder with mixed disturbance of emotions and conduct |
| F43.29 | Adjustment disorder with other symptoms                            |

7  
8  
9 Anxiety was determined by either the following ICD-10CM codes or a prescription for anxiety  
10 medication (Anxiolytic Benzodiazepines)

11

|         |                                                                                                                  |
|---------|------------------------------------------------------------------------------------------------------------------|
| F06.4   | Anxiety disorder due to known physiological condition                                                            |
| F10.180 | Alcohol abuse with alcohol-induced anxiety disorder                                                              |
| F10.280 | Alcohol dependence with alcohol-induced anxiety disorder                                                         |
| F10.980 | Alcohol use, unspecified with alcohol-induced anxiety disorder                                                   |
| F12.180 | Cannabis abuse with cannabis-induced anxiety disorder                                                            |
| F12.280 | Cannabis dependence with cannabis-induced anxiety disorder                                                       |
| F12.980 | Cannabis use, unspecified with anxiety disorder                                                                  |
| F13.180 | Sedative, hypnotic or anxiolytic abuse with sedative, hypnotic or anxiolytic-induced anxiety disorder            |
| F13.280 | Sedative, hypnotic or anxiolytic dependence with sedative, hypnotic or anxiolytic-induced anxiety disorder       |
| F13.980 | Sedative, hypnotic or anxiolytic use, unspecified with sedative, hypnotic or anxiolytic-induced anxiety disorder |
| F14.180 | Cocaine abuse with cocaine-induced anxiety disorder                                                              |
| F14.280 | Cocaine dependence with cocaine-induced anxiety disorder                                                         |
| F14.980 | Cocaine use, unspecified with cocaine-induced anxiety disorder                                                   |
| F15.180 | Other stimulant abuse with stimulant-induced anxiety disorder                                                    |
| F15.280 | Other stimulant dependence with stimulant-induced anxiety disorder                                               |
| F15.980 | Other stimulant use, unspecified with stimulant-induced anxiety disorder                                         |
| F16.180 | Hallucinogen abuse with hallucinogen-induced anxiety disorder                                                    |
| F16.280 | Hallucinogen dependence with hallucinogen-induced anxiety disorder                                               |
| F16.980 | Hallucinogen use, unspecified with hallucinogen-induced anxiety disorder                                         |
| F18.180 | Inhalant abuse with inhalant-induced anxiety disorder                                                            |
| F18.280 | Inhalant dependence with inhalant-induced anxiety disorder                                                       |
| F18.980 | Inhalant use, unspecified with inhalant-induced anxiety disorder                                                 |
| F19.180 | Other psychoactive substance abuse with psychoactive substance-induced anxiety disorder                          |
| F19.280 | Other psychoactive substance dependence with psychoactive substance-induced anxiety disorder                     |
| F19.980 | Other psychoactive substance use, unspecified with psychoactive substance-induced anxiety disorder               |
| F34.1   | Dysthymic disorder                                                                                               |
| F40.00  | Agoraphobia, unspecified                                                                                         |
| F40.01  | Agoraphobia with panic disorder                                                                                  |
| F40.02  | Agoraphobia without panic disorder                                                                               |
| F40.10  | Social phobia, unspecified                                                                                       |

|         |                                                           |
|---------|-----------------------------------------------------------|
| F40.11  | Social phobia, generalized                                |
| F40.210 | Arachnophobia                                             |
| F40.218 | Other animal type phobia                                  |
| F40.220 | Fear of thunderstorms                                     |
| F40.228 | Other natural environment type phobia                     |
| F40.230 | Fear of blood                                             |
| F40.231 | Fear of injections and transfusions                       |
| F40.232 | Fear of other medical care                                |
| F40.233 | Fear of injury                                            |
| F40.240 | Claustrophobia                                            |
| F40.241 | Acrophobia                                                |
| F40.242 | Fear of bridges                                           |
| F40.243 | Fear of flying                                            |
| F40.248 | Other situational type phobia                             |
| F40.290 | Androphobia                                               |
| F40.291 | Gynephobia                                                |
| F40.298 | Other specified phobia                                    |
| F40.8   | Other phobic anxiety disorders                            |
| F40.9   | Phobic anxiety disorder, unspecified                      |
| F41.0   | Panic disorder [episodic paroxysmal anxiety]              |
| F41.1   | Generalized anxiety disorder                              |
| F41.3   | Other mixed anxiety disorders                             |
| F41.8   | Other specified anxiety disorders                         |
| F41.9   | Anxiety disorder, unspecified                             |
| F43.22  | Adjustment disorder with anxiety                          |
| F43.23  | Adjustment disorder with mixed anxiety and depressed mood |
| F45.21  | Hypochondriasis                                           |
| F51.5   | Nightmare disorder                                        |
| F93.0   | Separation anxiety disorder of childhood                  |
| F94.0   | Selective mutism                                          |

12  
13  
14  
15  
16  
17  
18

Alcohol and Other Drug Abuse and Dependence (AOD) was defined by HEDIS Value Set:  
AOD Abuse and Dependence – OID 2.16.840.1.113883.3.464.1004.1013

Conduct Disorder was defined by any of the following ICD-10-CM codes:

|       |                                             |
|-------|---------------------------------------------|
| F91.0 | Conduct disorder confined to family context |
| F91.1 | Conduct disorder, childhood-onset type      |
| F91.2 | Conduct disorder, adolescent-onset type     |
| F91.8 | Other conduct disorders                     |
| F91.9 | Conduct disorder, unspecified               |

19  
20  
21  
22  
23  
24  
25

Depression was defined by the HEDIS value set, Major Depression Value Set – OID  
2.16.840.1.113883.3.464.1004.1166, or by a prescription for depression medication.

Oppositional Defiant Disorder was defined by ICD-10-CM code, F91.3 - Oppositional defiant disorder.

26 Post-Traumatic Stress Disorder was defined by ICD-10-CM codes F43.10 – post-traumatic stress  
27 disorder, unspecified; F43.11 – post-traumatic stress disorder, acute; F43.12 – post-traumatic  
28 stress disorder, chronic

29 Reactive to Stress was defined by any of the following ICD10 codes: F43.0 Acute stress  
30 reaction; F43.8 Other reactions to severe stress; F43.9 Reaction to severe stress, unspecified

31  
32

### 33 Defining Hospitalizations, Emergency Department usage and Behavioral vs non-Behavioral

34

35 Hospital and emergency department visits were defined using Revenue codes. The determination  
36 between behavioral and non-behavioral is maintained utilizing Relias internal clinical expertise.  
37 A periodic review process pulls new codes from First Databank (FDB), surfaces them for review,  
38 and then internal clinical expertise assigns the Behavioral or non-Behavioral value. Behavioral,  
39 physical or pharmacy claims were defined using the pharmacy claim type, diagnosis codes or  
40 procedure codes.

41

42

### 43 Describing the Behavioral Health Organizations included

44

45 The current study included data from 5 organizations in Southern and Midwest states. Four of  
46 the organizations serve both adults and children providing mental health services, IDD services,  
47 and substance abuse services. One of the organizations is a collection of state Medicaid agencies  
48 and the coalition for community behavioral health centers that oversees and supports services  
49 and outcomes for over 1 million Medicaid eligible members. They serve patients through  
50 pharmacy management programs, community behavioral health centers, and child and youth  
51 services. Services captured in the data primarily include mental health services, pharmacy  
52 services and filled prescriptions, and IDD services.

53 Table 2. Top 5 Most Common Mental Health Diagnoses by Age by Cohort

| For Ages <18   |                                                                          |                                                                          |
|----------------|--------------------------------------------------------------------------|--------------------------------------------------------------------------|
|                | Pre-Covid                                                                | Covid                                                                    |
| 1              | Attention-deficit hyperactivity disorders                                | Attention-deficit hyperactivity disorders                                |
| 2              | Reaction to severe stress, and adjustment disorders                      | Reaction to severe stress, and adjustment disorders                      |
| 3              | Specific developmental disorders of speech and language                  | Encounter for general exam without complaint, susp or reported diagnosis |
| 4              | Encounter for general exam without complaint, susp or reported diagnosis | Specific developmental disorders of speech and language                  |
| 5              | Other anxiety disorders                                                  | Other anxiety disorders                                                  |
| For Ages 18-64 |                                                                          |                                                                          |
|                | Pre-Covid                                                                | Covid                                                                    |
| 1              | Other anxiety disorders                                                  | Other anxiety disorders                                                  |
| 2              | Major depressive disorder, recurrent                                     | Major depressive disorder, recurrent                                     |
| 3              | Bipolar Disorder                                                         | Bipolar Disorder                                                         |
| 4              | Major depressive disorder, single episode                                | Major depressive disorder, single episode                                |
| 5              | Reaction to severe stress, and adjustment disorders                      | Reaction to severe stress, and adjustment disorders                      |
| For Ages 65+   |                                                                          |                                                                          |
|                | Pre-Covid                                                                | Covid                                                                    |
| 1              | Unspecified dementia                                                     | Unspecified dementia                                                     |
| 2              | Other anxiety disorders                                                  | Other anxiety disorders                                                  |
| 3              | Major depressive disorder, recurrent                                     | Major depressive disorder, recurrent                                     |
| 4              | Major depressive disorder, single episode                                | Major depressive disorder, single episode                                |
| 5              | Schizophrenia                                                            | Schizophrenia                                                            |

54

55

56 Table 3.

**New patients, new patients with anxiety and depression by age and time period**

| Age Band | Total New Patients with Service |             |         | New Patients with Anxiety |             |         | New Patients with Depression |             |         |
|----------|---------------------------------|-------------|---------|---------------------------|-------------|---------|------------------------------|-------------|---------|
|          | Pre period                      | Post period | p-value | Pre period                | Post period | p-value | Pre period                   | Post period | p-value |
| <18      | 137758                          | 210562      | <.001   | 681                       | 1274        | .698    | 5361                         | 11417       | <.001   |
| 18-64    | 132046                          | 216202      | <.001   | 7501                      | 14378       | <.001   | 28807                        | 57097       | .121    |
| 65+      | 20560                           | 30375       | <.001   | 725                       | 1051        | .768    | 4056                         | 6298        | .077    |

57  
58

59 Table 4.

| For Ages <18           |                          |                                          |                                                      |                                              |                                                          |
|------------------------|--------------------------|------------------------------------------|------------------------------------------------------|----------------------------------------------|----------------------------------------------------------|
| Cohort                 | % with Outpatient Visits | % with Behavioral Health Hospital Visits | % with Behavioral Health Emergency Department Visits | % with Non-Behavioral Health Hospital Visits | % with Non-Behavioral Health Emergency Department Visits |
| Pre-Covid<br>N=833,969 | 96.25%                   | 0.90%                                    | 0.94%                                                | 1.61%                                        | 32.83%                                                   |
| Covid<br>N=751,349     | 96.61%                   | 0.90%                                    | 0.93%                                                | 1.43%                                        | 22.72%                                                   |
| p-value <sup>a</sup>   | <.001                    | <.001                                    | <.001                                                | .811                                         | <.001                                                    |
| For Ages 18-64         |                          |                                          |                                                      |                                              |                                                          |
| Pre-Covid<br>N=622,417 | 94.49%                   | 2.47%                                    | 3.48%                                                | 15.05%                                       | 46.42%                                                   |
| Covid<br>N=590,706     | 95.71%                   | 2.33%                                    | 3.13%                                                | 14.15%                                       | 40.88%                                                   |
| p-value <sup>a</sup>   | <.001                    | .344                                     | <.001                                                | <.001                                        | <.001                                                    |
| For Ages 65+           |                          |                                          |                                                      |                                              |                                                          |
| Pre-Covid<br>N=130,442 | 97.52%                   | 0.98%                                    | 1.08%                                                | 22.02%                                       | 34.10%                                                   |
| Covid<br>N=116,471     | 97.54%                   | 0.68%                                    | 0.84%                                                | 19.89%                                       | 13.09%                                                   |
| p-value <sup>a</sup>   | <.001                    | <.001                                    | <.001                                                | <.001                                        | <.001                                                    |

60 Note. P-values are based on bivariate logistic regression analyses with Cohort as the outcome. The generalized estimating equations  
61 framework to run the logistic regression to adjust for clustering of observations across observation periods.  
62

63 Table 5. Comparing diagnoses before and during the pandemic era by age

| Age Band | Diagnosis Description         | Pre-period     |       | Post-period    |       | p-value |
|----------|-------------------------------|----------------|-------|----------------|-------|---------|
|          |                               | Patient Counts | %     | Patient Counts | %     |         |
| <18      | Oppositional defiant disorder | 26900          | 3.01  | 23074          | 2.84  | .065    |
|          | Conduct disorder              | 13165          | 1.47  | 10606          | 1.31  | <.001   |
|          | Anxiety disorder, unspecified | 8747           | 0.98  | 8388           | 1.03  | <.001   |
|          | Depression                    | 63769          | 7.14  | 69130          | 8.51  | <.001   |
|          | PTSD                          | 19032          | 2.18  | 19661          | 2.50  | <.001   |
|          | Adjustment disorders          | 34979          | 4.01  | 30688          | 3.90  | <.001   |
|          | Reactive to stress            | 10584          | 1.21  | 9961           | 1.26  | <.001   |
|          | AOD                           | 5277           | 0.60  | 5501           | 0.70  | <.001   |
|          | ADHD                          | 92345          | 10.59 | 86530          | 10.99 | <.001   |
| 18-64    | Anxiety disorder, unspecified | 79704          | 11.70 | 69746          | 10.74 | <.001   |
|          | Depression                    | 244004         | 35.82 | 233622         | 35.98 | <.001   |
|          | PTSD                          | 42041          | 6.46  | 41742          | 6.70  | <.001   |
|          | adjustment disorders          | 20842          | 3.20  | 18191          | 2.92  | <.001   |
|          | reactive to stress disorder   | 6487           | 1.00  | 5855           | 0.94  | .388    |
|          | AOD                           | 67612          | 10.39 | 64354          | 10.34 | <.001   |
| 65+      | Anxiety disorder, unspecified | 8470           | 5.99  | 6369           | 4.99  | <.001   |
|          | Depression                    | 38503          | 27.25 | 31982          | 25.08 | <.001   |
|          | PTSD                          | 1320           | 1     | 1127           | 0.94  | .845    |
|          | adjustment disorders          | 2503           | 1.89  | 1953           | 1.62  | <.001   |
|          | reactive to stress disorder   | 312            | 0.24  | 230            | 0.19  | .129    |
|          | AOD                           | 4057           | 3.06  | 3294           | 2.74  | .001    |

64 Note. The similar or even decreased patient counts in anxiety and depression between pre- and post-periods despite the increase in  
65 new patients with these diagnoses reflects members dropping out between pre- and post-period.
